# Supplementary material for: Transcriptional profiling of Pseudomonas aeruginosa and Staphylococcus aureus during in vitro co-culture
Source: PubMed Central journal article supplement (PMC6327441; doi:10.1186/s12864-018-5398-y), 2019-01-10
Supplement: 12864_2018_5398_MOESM2_ESM.pdf [file 12864_2018_5398_MOESM2_ESM.pdf]

## Correlation between RNAseq/qRT-PCR data

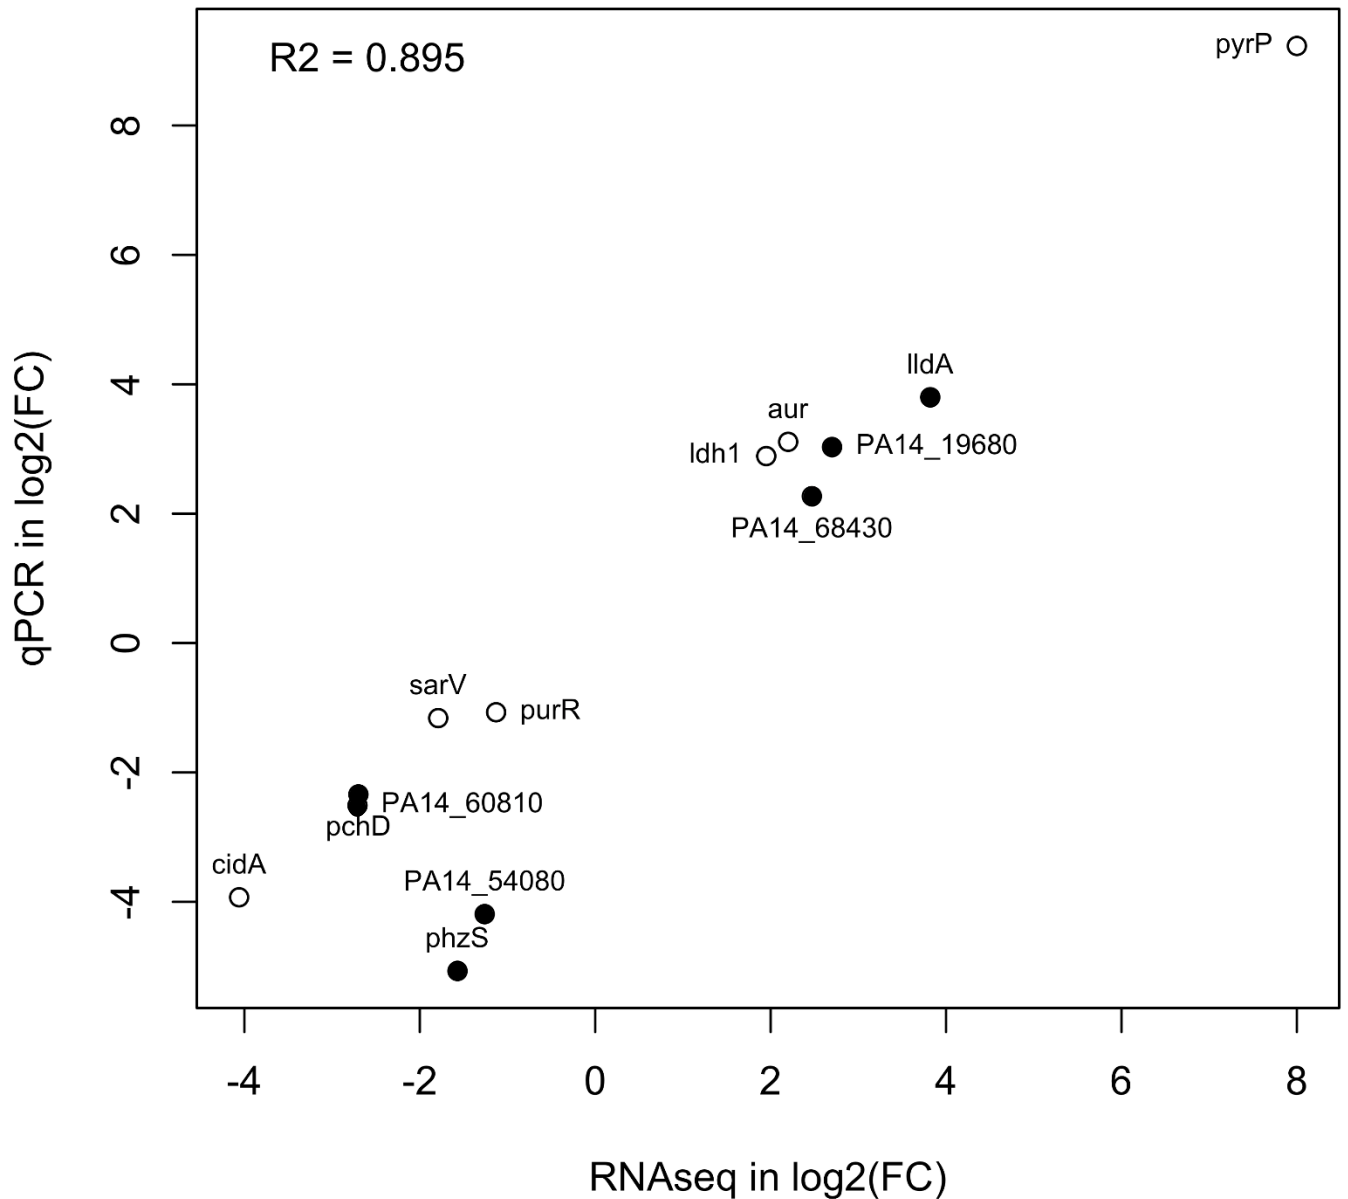

Fig. S2 Comparison of the fold-changes (log<sub>2</sub> base) obtained by RNA sequencing and qRT-PCR for three genes that were up- or down-regulated in each organism in response to the competitor. A statistically significant correlation ( $R^2 = 0.895$ ,  $p < 0.05$ ) was found for the 12 genes tested. *P. aeruginosa* genes (filled symbols), *S. aureus* genes (open symbols). Data points represent the average of the three replicate samples. The package 'gplots' of R (<https://cran.r-project.org/web/packages/gplots/index.html>) was used for the regression analysis.
